# Supplementary material for: One-pot atmospheric pressure synthesis of [H3Ru4(CO)12]−
Source: Royal Society of Chemistry journal article supplement (doi:10.1039/d1dt01517f), 2021-01-01
Supplement: d1dt01517f2.pdf [file d1dt01517f2.pdf]

## Supporting Information for

### One-Pot Atmospheric Pressure Synthesis of $[\text{H}_3\text{Ru}_4(\text{CO})_{12}]^-$

Cristiana Cesari,<sup>a\*</sup> Marco Bortoluzzi,<sup>b</sup> Cristina Femoni,<sup>a</sup> Maria Carmela Iapalucci<sup>a</sup> and Stefano Zacchini<sup>a</sup>

<sup>a</sup> Dipartimento di Chimica Industriale "Toso Montanari", Università di Bologna, Viale Risorgimento 4 - 40136 Bologna, Italy. E-mail: cristiana.cesari2@unibo.it

<sup>b</sup> Dipartimento di Scienze Molecolari e Nanosistemi, Ca' Foscari University of Venice, Via Torino 155 – 30175 Mestre (Ve), Italy.

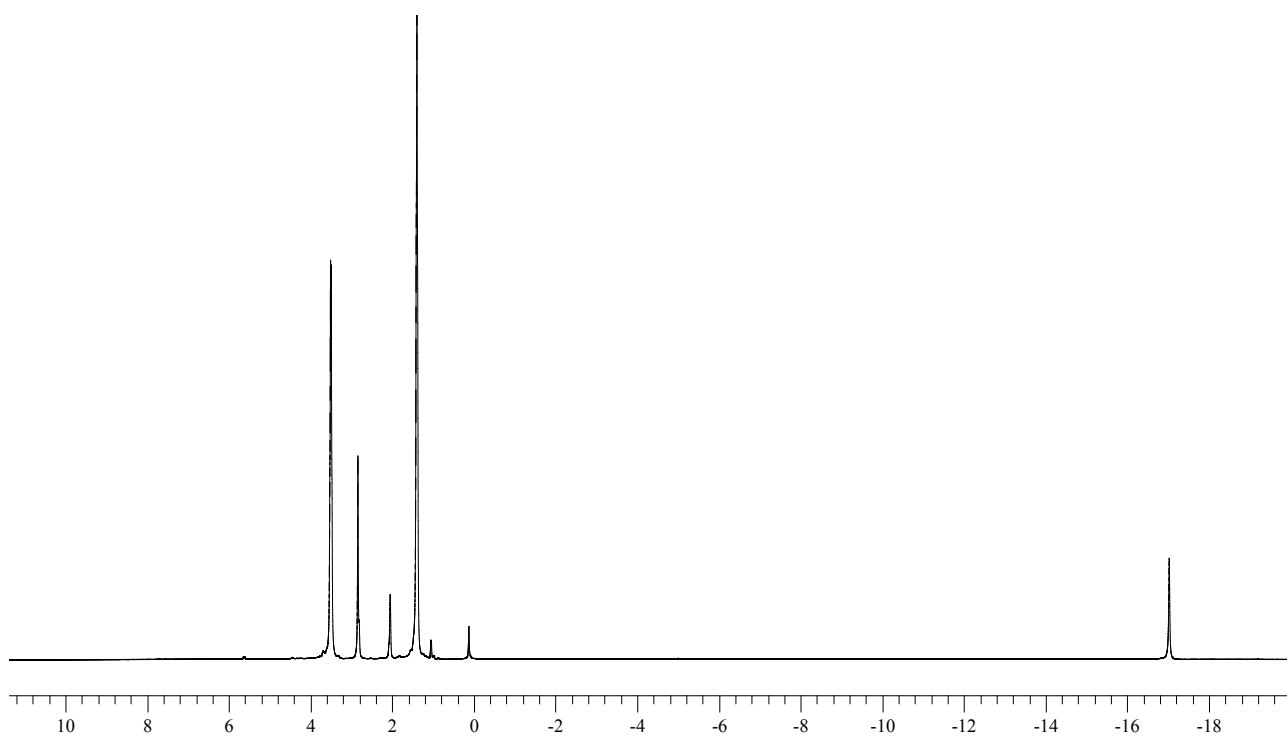

**Figure S1.** <sup>1</sup>H NMR spectrum of [NEt<sub>4</sub>][H<sub>3</sub>Ru<sub>4</sub>(CO)<sub>12</sub>] (**1**) in acetone-d<sup>6</sup>.

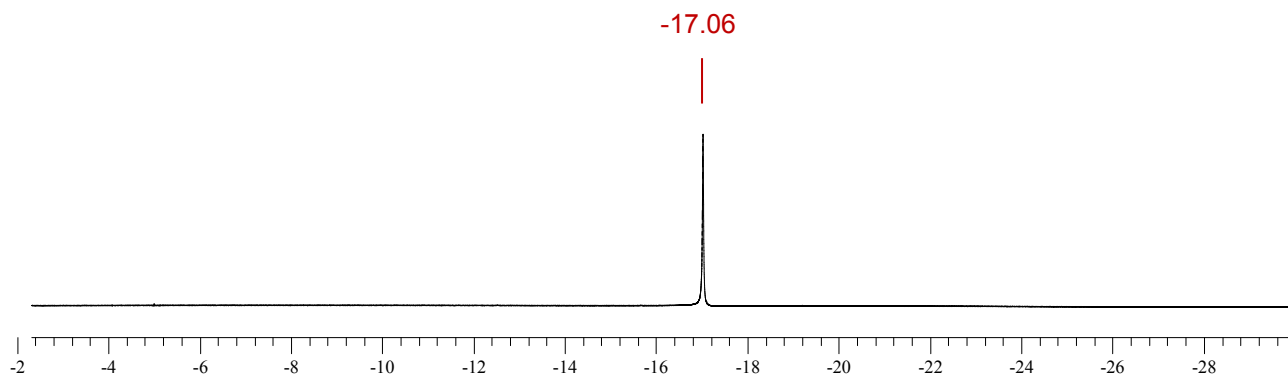

**Figure S2.** Hydride region of the <sup>1</sup>H NMR spectrum of [NEt<sub>4</sub>][H<sub>3</sub>Ru<sub>4</sub>(CO)<sub>12</sub>] (**1**) in acetone-d<sup>6</sup>.

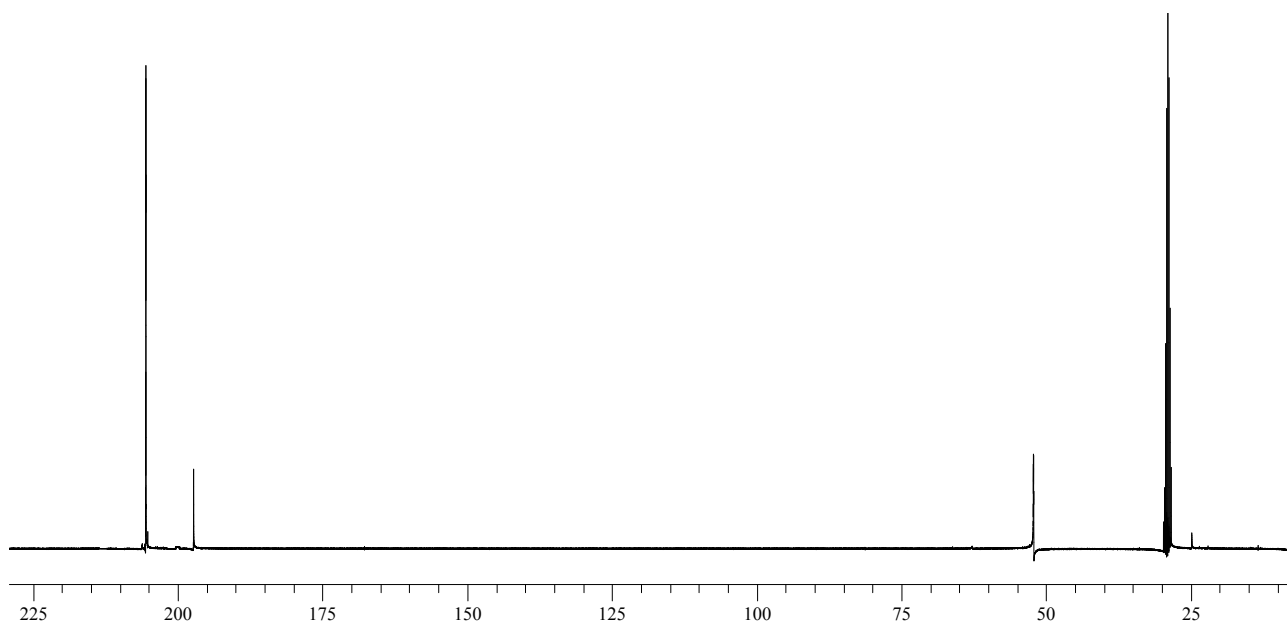

**Figure S3.**  $^{13}\text{C}\{^1\text{H}\}$  NMR spectrum of  $[\text{NEt}_4][\text{H}_3\text{Ru}_4(\text{CO})_{12}]$  (**1**) in acetone- $\text{d}_6$ .

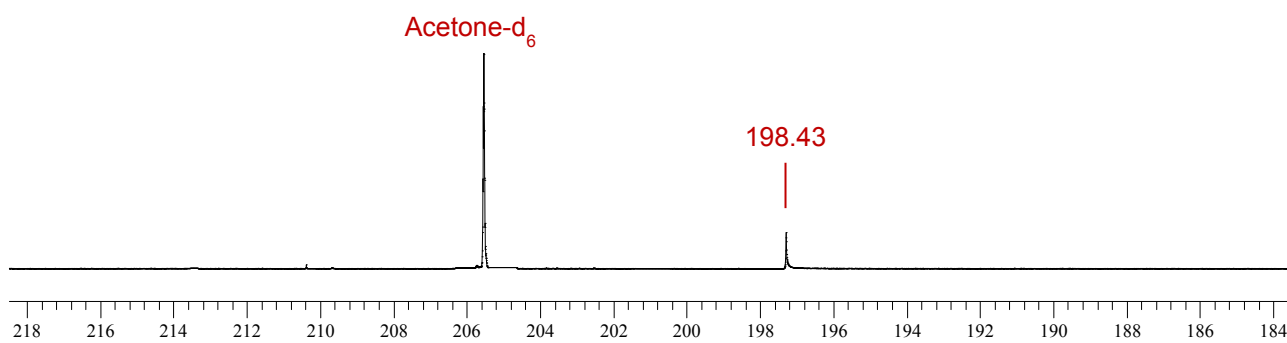

**Figure S4.** Carbonyl region of the  $^{13}\text{C}\{^1\text{H}\}$  NMR spectrum of  $[\text{NEt}_4][\text{H}_3\text{Ru}_4(\text{CO})_{12}]$  (**1**) in acetone- $\text{d}_6$ .

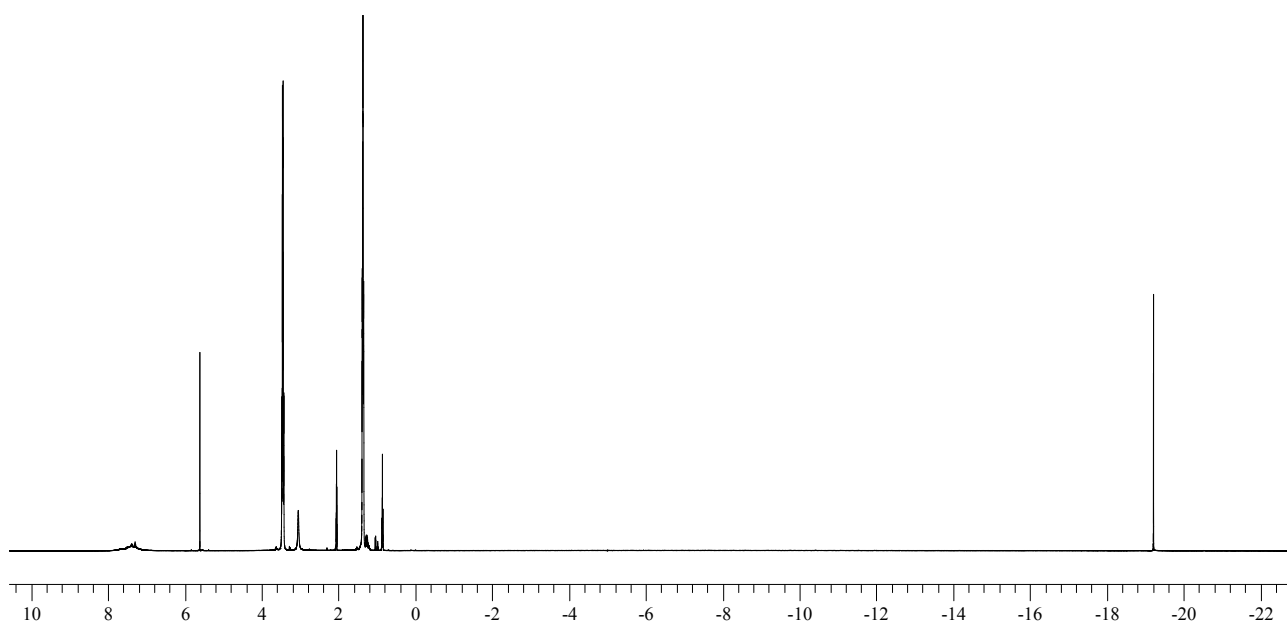

**Figure S5.**  $^1\text{H}$  NMR spectrum of  $[\text{NEt}_4]_2[\text{H}_2\text{Ru}_4(\text{CO})_{12}]$  in acetone- $\text{d}_6$ .

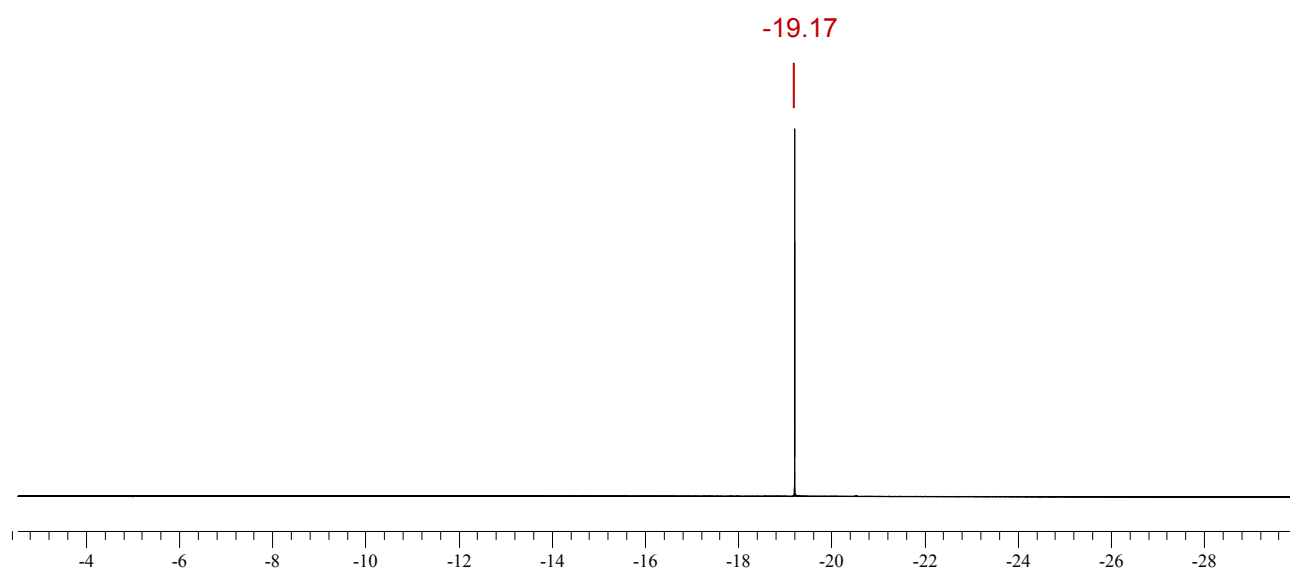

**Figure S6.** Hydride region of the  $^1\text{H}$  NMR spectrum of  $[\text{NEt}_4]_2[\text{H}_2\text{Ru}_4(\text{CO})_{12}]$  in acetone- $\text{d}_6$ .

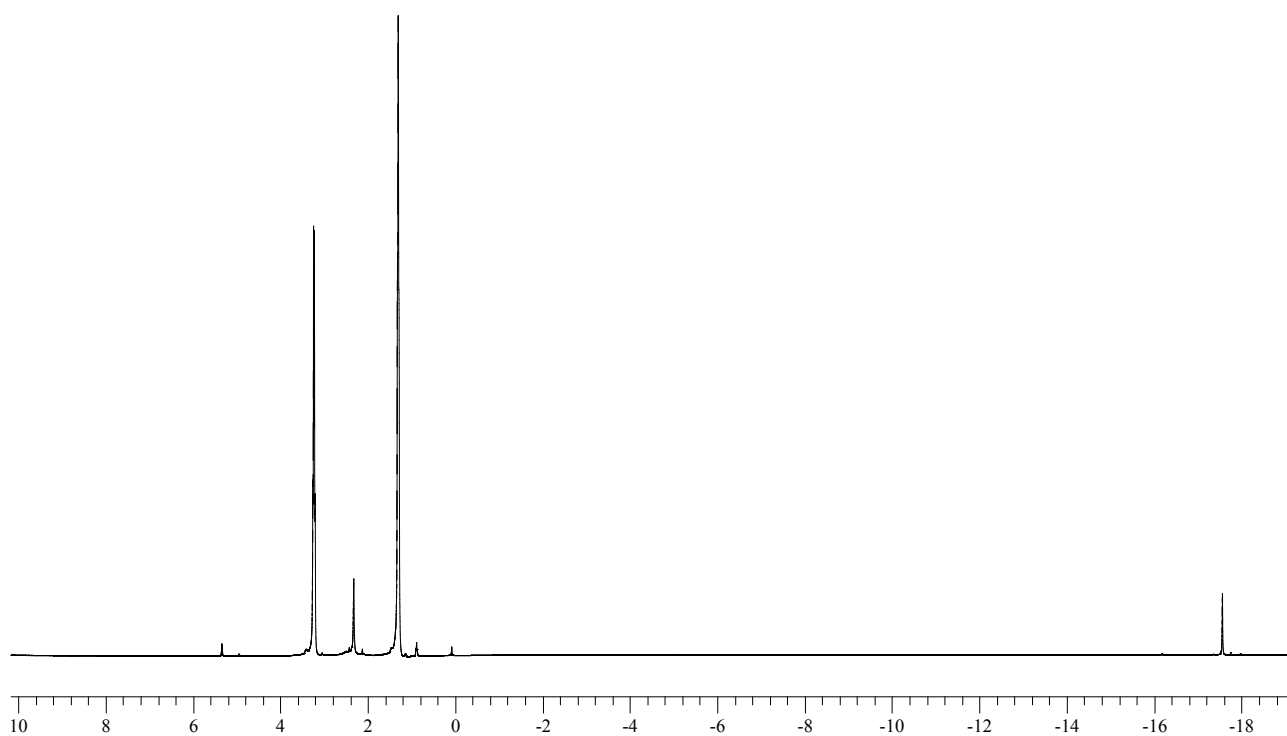

**Figure S7.** <sup>1</sup>H NMR spectrum of [H<sub>3</sub>Ru<sub>4</sub>(CO)<sub>12</sub>(CuCH<sub>3</sub>CN)] in CD<sub>2</sub>Cl<sub>2</sub>.

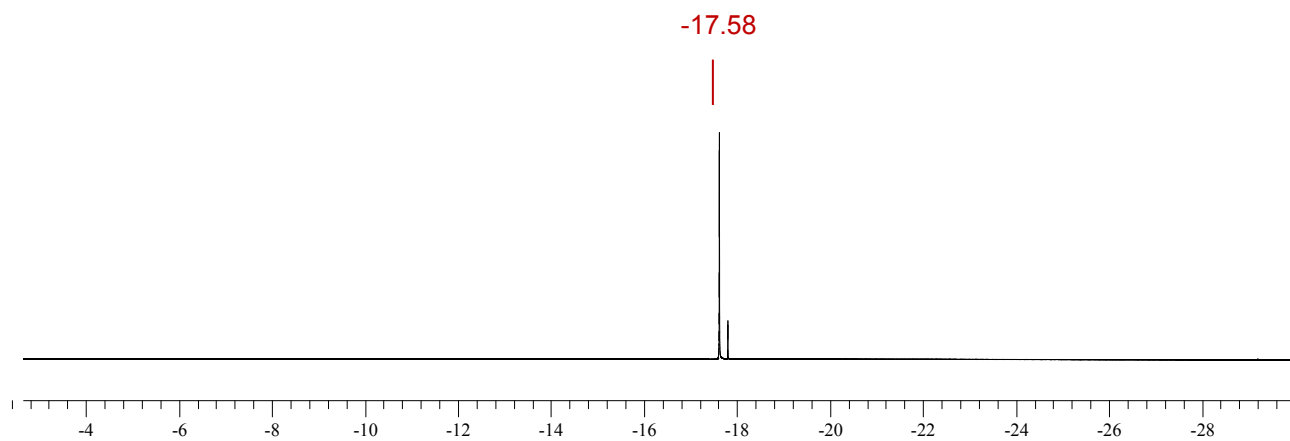

**Figure S8.** Hydride region of <sup>1</sup>H NMR spectrum of [H<sub>3</sub>Ru<sub>4</sub>(CO)<sub>12</sub>(CuCH<sub>3</sub>CN)] in CD<sub>2</sub>Cl<sub>2</sub>.

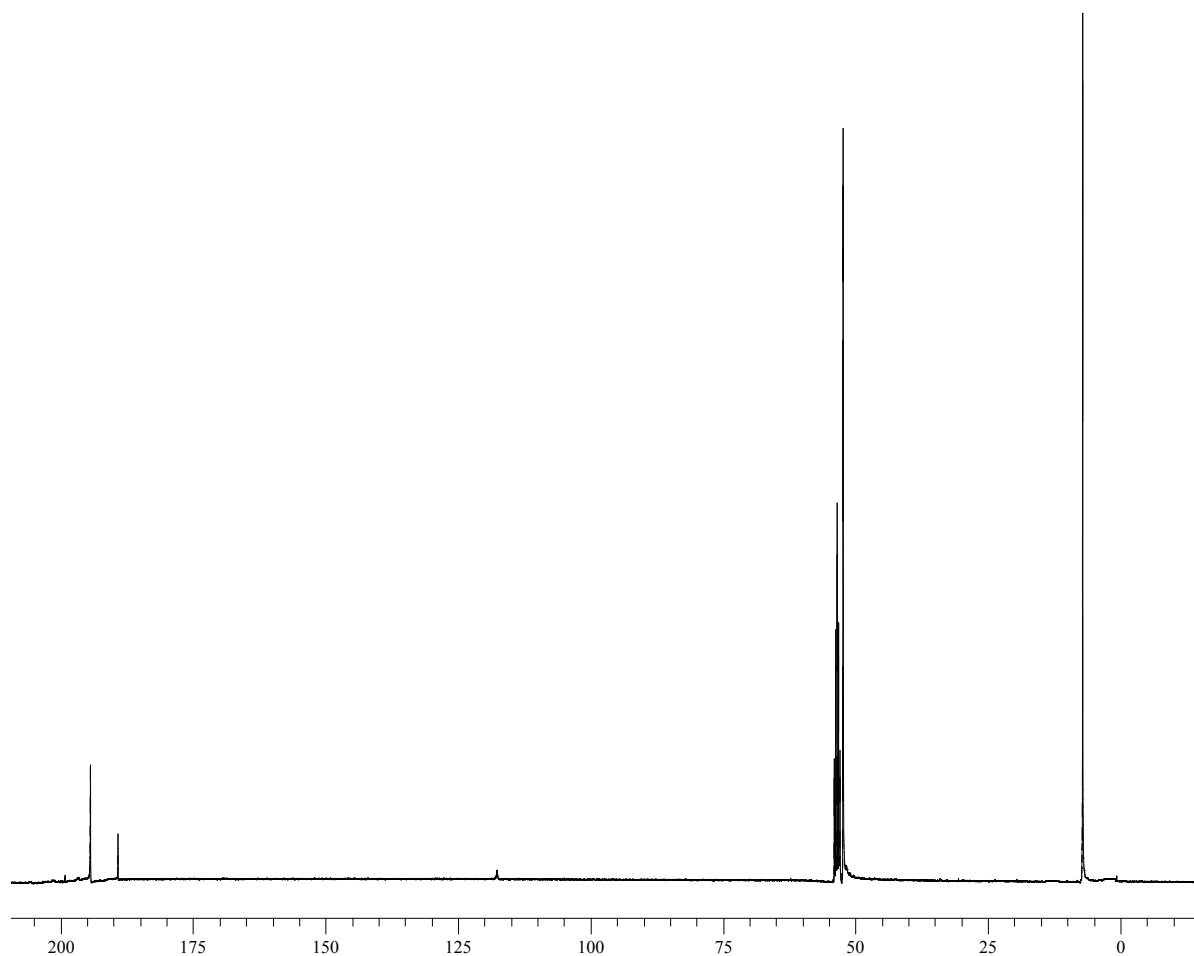

**Figure S9.**  $^{13}\text{C}\{^1\text{H}\}$  NMR spectrum of  $[\text{H}_3\text{Ru}_4(\text{CO})_{12}(\text{CuCH}_3\text{CN})]$  in  $\text{CD}_2\text{Cl}_2$ .

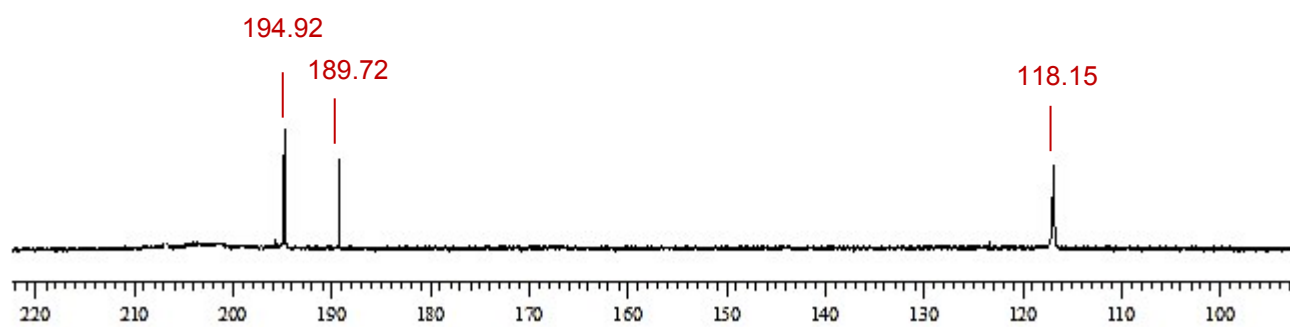

**Figure S10.** Carbonyl region of  $^{13}\text{C}\{^1\text{H}\}$  NMR spectrum of  $[\text{H}_3\text{Ru}_4(\text{CO})_{12}(\text{CuCH}_3\text{CN})]$  in  $\text{CD}_2\text{Cl}_2$ .

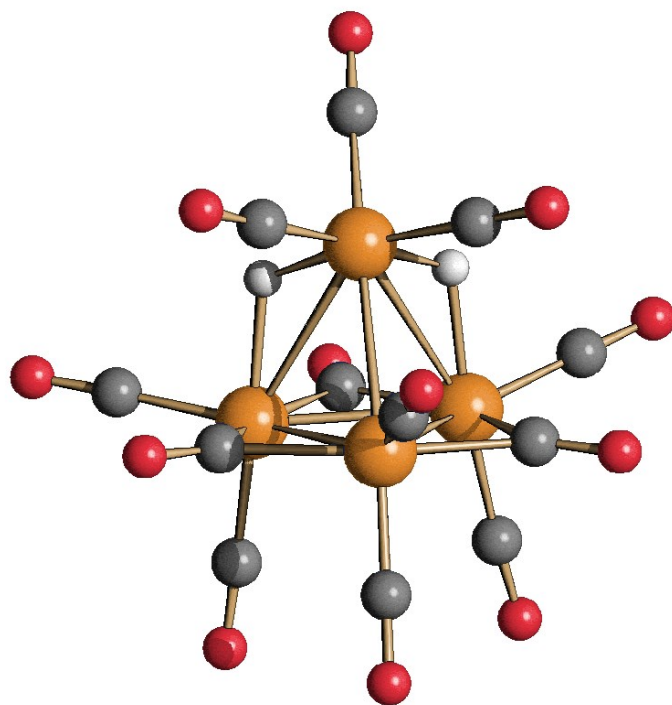

**Figure S11.** Molecular structure of  $[\text{H}_2\text{Ru}_4(\text{CO})_{12}]^{2-}$  (orange Ru; red O; grey C; white H).

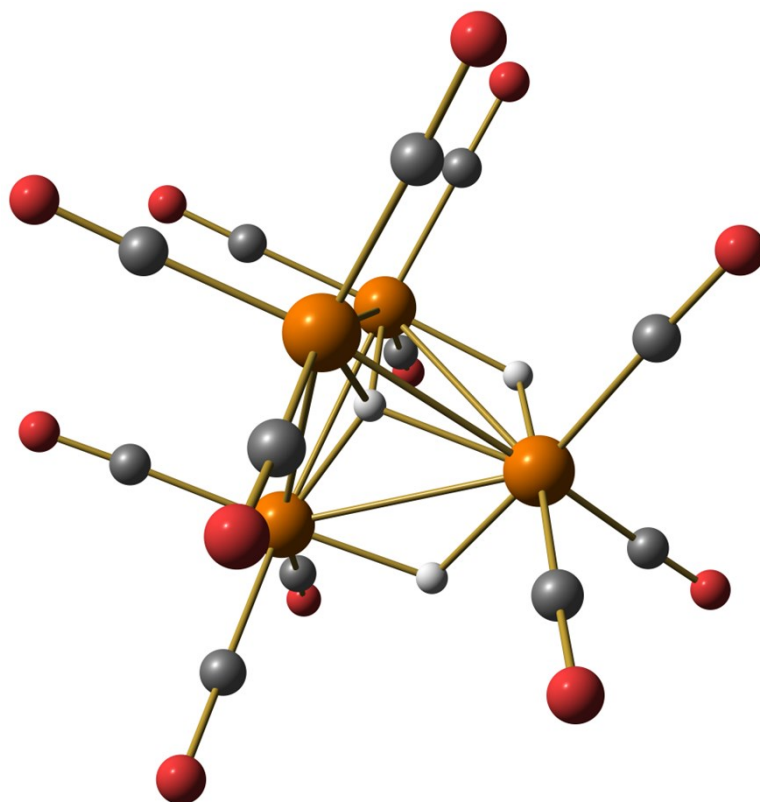

**Fig. S12.** DFT-optimized structure of the most stable  $[\text{H}_3\text{Ru}_4(\text{CO})_{12}]^-$  isomer with one  $\mu_4\text{-H}$  (orange Ru; red O; grey C; white H).

**Table S1**

Crystal data and experimental details for  $[\text{NET}_4][\text{H}_3\text{Ru}_4(\text{CO})_{12}]$ ,

$\text{K}_2[\text{NET}_4]_2[\text{Ru}_8(\text{CO})_{16}(\text{Br})_4(\text{CO}_3)_4] \cdot 5\text{CH}_3\text{COCH}_3$ ,  $\text{K}_2[\text{NET}_4]_3[\text{Ru}_8(\text{CO})_{16}(\text{Br})_4(\text{CO}_3)_4][\text{Br}] \cdot 4\text{CH}_3\text{COCH}_3$ ,  $[\text{NET}_4]_4[\text{Ru}_8(\text{CO})_{16}(\text{Br})_4(\text{CO}_3)_4] \cdot 2\text{CH}_3\text{COCH}_3$ ,  $\text{K}_2[\text{NBu}_4]_2[\text{Ru}_8(\text{CO})_{16}(\text{Br})_4(\text{CO}_3)_4] \cdot 4\text{CH}_3\text{COCH}_3$ ,  $\text{K}_2[\text{NET}_4]_2[\text{Ru}_8(\text{CO})_{16}(\text{Cl})_4(\text{CO}_3)_4] \cdot 6\text{CH}_3\text{CN} \cdot \text{solv}$ ,  $[\text{NET}_4]_4[\text{Ru}_8(\text{CO})_{16}(\text{I})_4(\text{CO}_3)_4] \cdot 4\text{CH}_3\text{COCH}_3$ ,  $\text{K}[\text{NET}_4]_3\{\text{[Ru}_{10}(\text{CO})_{20}(\text{Br})_4(\text{CO}_3)_4]_2\}$ ,  $[\text{NET}_4]_2[\text{H}_2\text{Ru}_4(\text{CO})_{12}]$ ,  $[\text{Ag}(\text{IPr})_2][\text{H}_3\text{Ru}_4(\text{CO})_{12}] \cdot \text{solv}$ ,  $[\text{NET}_4]_2[\text{Ru}_6\text{C}(\text{CO})_{16}] \cdot \text{CH}_2\text{Cl}_2$ ,  $[\text{Cu}(\text{IMes})_2]_2[\{\text{Ru}_6\text{C}(\text{CO})_{16}\}_2\text{Cu}_4\text{Cl}_2] \cdot \text{CH}_2\text{Cl}_2 \cdot \text{solv}$ ,  $[\text{H}_3\text{Ru}_4(\text{CO})_{12}(\text{CuCH}_3\text{CN})]$ ,  $[\text{NET}_4]_2[\text{H}_2\text{Ru}_4(\text{CO})_{12}(\text{CuBr})_2] \cdot \text{CH}_2\text{Cl}_2$ , and  $[\text{NET}_4]_2[\text{H}_2\text{Ru}_{12}(\text{CO})_{34}\text{Cu}_6\text{Br}_2] \cdot \text{solv}$ .

|                                            | $[\text{NET}_4][\text{H}_3\text{Ru}_4(\text{CO})_{12}]$ | $\text{K}_2[\text{NET}_4]_2[\text{Ru}_8(\text{CO})_{16}(\text{Br})_4(\text{CO}_3)_4] \cdot 5\text{CH}_3\text{COCH}_3$ | $\text{K}_2[\text{NET}_4]_3[\text{Ru}_8(\text{CO})_{16}(\text{Br})_4(\text{CO}_3)_4][\text{Br}] \cdot 4\text{CH}_3\text{COCH}_3$ |
|--------------------------------------------|---------------------------------------------------------|-----------------------------------------------------------------------------------------------------------------------|----------------------------------------------------------------------------------------------------------------------------------|
| Formula                                    | $\text{C}_{20}\text{H}_{23}\text{NO}_{12}\text{Ru}_4$   | $\text{C}_{51}\text{H}_{70}\text{Br}_4\text{K}_2\text{N}_2\text{O}_{33}\text{Ru}_8$                                   | $\text{C}_{56}\text{H}_{84}\text{Br}_5\text{K}_2\text{N}_3\text{O}_{32}\text{Ru}_8$                                              |
| <i>F</i> w                                 | 873.67                                                  | 2445.49                                                                                                               | 2597.57                                                                                                                          |
| T, K                                       | 100(2)                                                  | 100(2)                                                                                                                | 100(2)                                                                                                                           |
| $\lambda$ , Å                              | 0.71073                                                 | 0.71073                                                                                                               | 0.71073                                                                                                                          |
| Crystal system                             | Monoclinic                                              | Monoclinic                                                                                                            | Monoclinic                                                                                                                       |
| Space Group                                | $P2_1/n$                                                | $P2_1/c$                                                                                                              | $P2_1/n$                                                                                                                         |
| a, Å                                       | 16.1592(7)                                              | 19.1095(8)                                                                                                            | 17.210(3)                                                                                                                        |
| b, Å                                       | 11.8097(5)                                              | 17.8113(7)                                                                                                            | 24.421(4)                                                                                                                        |
| c, Å                                       | 29.3937(13)                                             | 22.7190(9)                                                                                                            | 19.758(4)                                                                                                                        |
| $\alpha$ , °                               | 90                                                      | 90                                                                                                                    | 90                                                                                                                               |
| $\beta$ , °                                | 100.7560(10)                                            | 93.1740(10)                                                                                                           | 90.980(6)                                                                                                                        |
| $\gamma$ , °                               | 90                                                      | 90                                                                                                                    | 90                                                                                                                               |
| Cell Volume, Å <sup>3</sup>                | 5510.8(4)                                               | 7720.9(5)                                                                                                             | 8303(3)                                                                                                                          |
| Z                                          | 8                                                       | 4                                                                                                                     | 4                                                                                                                                |
| <i>D</i> <sub>c</sub> , g cm <sup>-3</sup> | 2.106                                                   | 2.104                                                                                                                 | 2.078                                                                                                                            |
| $\mu$ , mm <sup>-1</sup>                   | 2.209                                                   | 3.780                                                                                                                 | 4.000                                                                                                                            |
| F(000)                                     | 3376                                                    | 4736                                                                                                                  | 5048                                                                                                                             |
| Crystal size, mm                           | 0.19×0.16×0.14                                          | 0.21×0.18×0.16                                                                                                        | 0.18×0.16×0.11                                                                                                                   |
| $\theta$ limits, °                         | 1.575–25.998                                            | 1.454–25.999                                                                                                          | 1.556–25.000                                                                                                                     |
| Index ranges                               | -19 ≤ h ≤ 19<br>-14 ≤ k ≤ 14<br>-36 ≤ l ≤ 36            | -23 ≤ h ≤ 23<br>-21 ≤ k ≤ 21<br>-28 ≤ l ≤ 28                                                                          | -20 ≤ h ≤ 20<br>-29 ≤ k ≤ 29<br>-23 ≤ l ≤ 23                                                                                     |
| Reflections collected                      | 105608                                                  | 142356                                                                                                                | 59265                                                                                                                            |
| Independent reflections                    | 10814 [ <i>R</i> <sub>int</sub> = 0.0724]               | 15106 [ <i>R</i> <sub>int</sub> = 0.1080]                                                                             | 14377 [ <i>R</i> <sub>int</sub> = 0.1250]                                                                                        |
| Completeness to                            | 99.9%                                                   | 99.8%                                                                                                                 | 98.3%                                                                                                                            |



|                                                  |                 |                  |                   |
|--------------------------------------------------|-----------------|------------------|-------------------|
| $\theta$ max                                     |                 |                  |                   |
| Data / restraints / parameters                   | 10814 / 0 / 693 | 15106 / 12 / 919 | 14377 / 571 / 955 |
| Goodness on fit on $F^2$                         | 1.237           | 1.043            | 1.199             |
| $R_1$ ( $I > 2\sigma(I)$ )                       | 0.0320          | 0.0286           | 0.1514            |
| w $R_2$ (all data)                               | 0.0672          | 0.0656           | 0.3675            |
| Largest diff. peak and hole, e $\text{\AA}^{-3}$ | 0.759 / -0.714  | 1.059 / -1.376   | 4.955 / -2.562    |

|                             | <b>[NEt<sub>4</sub>]<sub>4</sub>[Ru<sub>8</sub>(CO)<sub>16</sub>(Br)<sub>4</sub>(CO<sub>3</sub>)<sub>4</sub>]·<br/>2CH<sub>3</sub>COCH<sub>3</sub></b> | <b>K<sub>2</sub>[NBu<sub>4</sub>]<sub>2</sub>[Ru<sub>8</sub>(CO)<sub>16</sub>(Br)<sub>4</sub>(CO<sub>3</sub>)<sub>4</sub>]·<br/>4CH<sub>3</sub>COCH<sub>3</sub></b> | <b>K<sub>2</sub>[NEt<sub>4</sub>]<sub>2</sub><br/>[Ru<sub>8</sub>(CO)<sub>16</sub>(Cl)<sub>4</sub>(CO<sub>3</sub>)<sub>4</sub>]·<br/>6CH<sub>3</sub>CN·solv</b> |
|-----------------------------|--------------------------------------------------------------------------------------------------------------------------------------------------------|---------------------------------------------------------------------------------------------------------------------------------------------------------------------|-----------------------------------------------------------------------------------------------------------------------------------------------------------------|
| Formula                     | C <sub>58</sub> H <sub>92</sub> Br <sub>4</sub> N <sub>4</sub> O <sub>30</sub> Ru <sub>8</sub>                                                         | C <sub>64</sub> H <sub>96</sub> Br <sub>4</sub> K <sub>2</sub> N <sub>2</sub> O <sub>32</sub> Ru <sub>8</sub>                                                       | C <sub>48</sub> H <sub>58</sub> Cl <sub>4</sub> K <sub>2</sub> N <sub>8</sub> O <sub>28</sub> Ru <sub>8</sub>                                                   |
| $F_w$                       | 2453.55                                                                                                                                                | 2611.82                                                                                                                                                             | 2223.58                                                                                                                                                         |
| T, K                        | 100(2)                                                                                                                                                 | 100(2)                                                                                                                                                              | 100(2)                                                                                                                                                          |
| $\lambda$ , $\text{\AA}$    | 0.71073                                                                                                                                                | 0.71073                                                                                                                                                             | 0.71073                                                                                                                                                         |
| Crystal system              | Monoclinic                                                                                                                                             | Triclinic                                                                                                                                                           | Tetragonal                                                                                                                                                      |
| Space Group                 | $C2/c$                                                                                                                                                 | $P\bar{1}$                                                                                                                                                          | $P4_2/nmc$                                                                                                                                                      |
| a, $\text{\AA}$             | 20.2618(8)                                                                                                                                             | 14.0395(9)                                                                                                                                                          | 18.2867(6)                                                                                                                                                      |
| b, $\text{\AA}$             | 19.7427(8)                                                                                                                                             | 16.7852(11)                                                                                                                                                         | 18.2867(6)                                                                                                                                                      |
| c, $\text{\AA}$             | 21.4241(8)                                                                                                                                             | 21.5954(14)                                                                                                                                                         | 22.1854(8)                                                                                                                                                      |
| $\alpha$ , °                | 90                                                                                                                                                     | 74.768(2)                                                                                                                                                           | 90                                                                                                                                                              |
| $\beta$ , °                 | 109.0000(10)                                                                                                                                           | 72.962(2)                                                                                                                                                           | 90                                                                                                                                                              |
| $\gamma$ , °                | 90                                                                                                                                                     | 67.148(2)                                                                                                                                                           | 90                                                                                                                                                              |
| Cell Volume, $\text{\AA}^3$ | 8103.2(6)                                                                                                                                              | 4419.3(5)                                                                                                                                                           | 7418.9(6)                                                                                                                                                       |
| Z                           | 4                                                                                                                                                      | 2                                                                                                                                                                   | 4                                                                                                                                                               |
| $D_c$ , g cm <sup>-3</sup>  | 2.011                                                                                                                                                  | 1.963                                                                                                                                                               | 1.991                                                                                                                                                           |
| $\mu$ , mm <sup>-1</sup>    | 3.500                                                                                                                                                  | 3.308                                                                                                                                                               | 1.919                                                                                                                                                           |
| F(000)                      | 4800                                                                                                                                                   | 2560                                                                                                                                                                | 4336                                                                                                                                                            |
| Crystal size, mm            | 0.16×0.11×0.10                                                                                                                                         | 0.24×0.21×0.14                                                                                                                                                      | 0.18×0.16×0.12                                                                                                                                                  |
| $\theta$ limits, °          | 1.481–25.099                                                                                                                                           | 1.528–27.037                                                                                                                                                        | 2.147–27.000                                                                                                                                                    |
| Index ranges                | -24 ≤ h ≤ 24<br>-23 ≤ k ≤ 23<br>-25 ≤ l ≤ 25                                                                                                           | -16 ≤ h ≤ 17<br>-20 ≤ k ≤ 21<br>-26 ≤ l ≤ 27                                                                                                                        | -23 ≤ h ≤ 23<br>-23 ≤ k ≤ 23<br>-28 ≤ l ≤ 28                                                                                                                    |
| Reflections                 | 71584                                                                                                                                                  | 89032                                                                                                                                                               | 150870                                                                                                                                                          |

|                                                   |                                    |                                     |                                    |
|---------------------------------------------------|------------------------------------|-------------------------------------|------------------------------------|
| collected                                         |                                    |                                     |                                    |
| Independent reflections                           | 7213 [ $R_{\text{int}} = 0.0772$ ] | 19223 [ $R_{\text{int}} = 0.0835$ ] | 4320 [ $R_{\text{int}} = 0.0642$ ] |
| Completeness to $\theta$ max                      | 99.9%                              | 99.9%                               | 99.9%                              |
| Data / restraints / parameters                    | 7213 / 157 / 462                   | 19223 / 60 / 1010                   | 4320 / 0 / 248                     |
| Goodness on fit on $F^2$                          | 1.093                              | 1.063                               | 1.259                              |
| $R_1$ ( $I > 2\sigma(I)$ )                        | 0.0683                             | 0.0696                              | 0.0290                             |
| $wR_2$ (all data)                                 | 0.1712                             | 0.1918                              | 0.0518                             |
| Largest diff. peak and hole, $e \text{ \AA}^{-3}$ | 3.434 / -2.847                     | 2.510 / -3.628                      | 0.491 / -0.748                     |

|                             | <b>[NEt<sub>4</sub>]<sub>4</sub>[Ru<sub>8</sub>(CO)<sub>16</sub>(I)<sub>4</sub>(CO<sub>3</sub>)<sub>4</sub>]·<br/>4CH<sub>3</sub>COCH<sub>3</sub></b> | <b>K[NEt<sub>4</sub>]<sub>3</sub>[Ru<sub>10</sub>(CO)<sub>20</sub>(Br)<sub>4</sub>(CO<sub>3</sub>)<sub>4</sub>]<sub>2</sub>·<br/>CH<sub>3</sub>COCH<sub>3</sub></b> | <b>[NEt<sub>4</sub>]<sub>2</sub>[H<sub>2</sub>Ru<sub>4</sub>(CO)<sub>12</sub>]</b> |
|-----------------------------|-------------------------------------------------------------------------------------------------------------------------------------------------------|---------------------------------------------------------------------------------------------------------------------------------------------------------------------|------------------------------------------------------------------------------------|
| Formula                     | C <sub>64</sub> H <sub>104</sub> I <sub>4</sub> N <sub>4</sub> O <sub>32</sub> Ru <sub>8</sub>                                                        | C <sub>39</sub> H <sub>36</sub> Br <sub>4</sub> K <sub>0.5</sub> N <sub>1.5</sub> O <sub>33</sub> Ru <sub>10</sub>                                                  | C <sub>28</sub> H <sub>42</sub> N <sub>2</sub> O <sub>12</sub> Ru <sub>4</sub>     |
| $F_w$                       | 2757.67                                                                                                                                               | 2403.58                                                                                                                                                             | 1002.91                                                                            |
| T, K                        | 100(2)                                                                                                                                                | 100(2)                                                                                                                                                              | 100(2)                                                                             |
| $\lambda$ , Å               | 0.71073                                                                                                                                               | 0.71073                                                                                                                                                             | 0.71073                                                                            |
| Crystal system              | Tetragonal                                                                                                                                            | Monoclinic                                                                                                                                                          | Monoclinic                                                                         |
| Space Group                 | $I4_1/a$                                                                                                                                              | $C2/c$                                                                                                                                                              | $P2_1/c$                                                                           |
| a, Å                        | 14.6311(5)                                                                                                                                            | 31.7547(15)                                                                                                                                                         | 13.3251(5)                                                                         |
| b, Å                        | 14.6311(5)                                                                                                                                            | 13.3024(6)                                                                                                                                                          | 20.1945(7)                                                                         |
| c, Å                        | 42.7670(16)                                                                                                                                           | 32.2056(15)                                                                                                                                                         | 13.4433(5)                                                                         |
| $\alpha$ , °                | 90                                                                                                                                                    | 90                                                                                                                                                                  | 90                                                                                 |
| $\beta$ , °                 | 90                                                                                                                                                    | 99.623(2)                                                                                                                                                           | 94.4270(10)                                                                        |
| $\gamma$ , °                | 90                                                                                                                                                    | 90                                                                                                                                                                  | 90                                                                                 |
| Cell Volume, Å <sup>3</sup> | 9155.1(7)                                                                                                                                             | 13412.7(11)                                                                                                                                                         | 3603.7(2)                                                                          |
| Z                           | 4                                                                                                                                                     | 8                                                                                                                                                                   | 4                                                                                  |
| $D_c$ , g cm <sup>-3</sup>  | 2.001                                                                                                                                                 | 2.381                                                                                                                                                               | 1.847                                                                              |
| $\mu$ , mm <sup>-1</sup>    | 2.707                                                                                                                                                 | 4.682                                                                                                                                                               | 1.701                                                                              |
| F(000)                      | 5344                                                                                                                                                  | 9072                                                                                                                                                                | 1984                                                                               |
| Crystal size, mm            | 0.21×0.16×0.12                                                                                                                                        | 0.15×0.13×0.06                                                                                                                                                      | 0.19×0.16×0.15                                                                     |
| $\theta$ limits, °          | 1.905–26.998                                                                                                                                          | 1.663–25.998                                                                                                                                                        | 1.533–26.000                                                                       |
| Index ranges                | -18 ≤ h ≤ 18<br>-18 ≤ k ≤ 18                                                                                                                          | -39 ≤ h ≤ 39<br>-16 ≤ k ≤ 16                                                                                                                                        | -16 ≤ h ≤ 16<br>-24 ≤ k ≤ 24                                                       |

|                                                | -54 ≤ l ≤ 54                     | -39 ≤ l ≤ 39                      | -16 ≤ l ≤ 16                     |
|------------------------------------------------|----------------------------------|-----------------------------------|----------------------------------|
| Reflections collected                          | 92507                            | 86381                             | 69738                            |
| Independent reflections                        | 5001 [R <sub>int</sub> = 0.0911] | 13176 [R <sub>int</sub> = 0.0602] | 7091 [R <sub>int</sub> = 0.0783] |
| Completeness to θ max                          | 100.0%                           | 99.9%                             | 100.0%                           |
| Data / restraints / parameters                 | 5001 / 366 / 363                 | 13176 / 121 / 831                 | 7091 / 0 / 429                   |
| Goodness on fit on F <sup>2</sup>              | 1.375                            | 1.156                             | 1.199                            |
| R <sub>1</sub> (I > 2σ(I))                     | 0.1081                           | 0.0529                            | 0.0324                           |
| wR <sub>2</sub> (all data)                     | 0.2152                           | 0.1128                            | 0.0585                           |
| Largest diff. peak and hole, e Å <sup>-3</sup> | 1.841 / -2.988                   | 1.310 / -1.581                    | 0.990 / -0.644                   |

|                                     | [Ag(IPr) <sub>2</sub> ]<br>[H <sub>3</sub> Ru <sub>4</sub> (CO) <sub>12</sub> ]·solv | [NEt <sub>4</sub> ] <sub>2</sub> [Ru <sub>6</sub> C(CO) <sub>16</sub> ]·CH <sub>2</sub> Cl <sub>2</sub> | [Cu(IMes) <sub>2</sub> ] <sub>2</sub> [{Ru <sub>6</sub> C(CO) <sub>16</sub> } <sub>2</sub> Cu <sub>4</sub> Cl <sub>2</sub> ]·<br>CH <sub>2</sub> Cl <sub>2</sub> ·solv |
|-------------------------------------|--------------------------------------------------------------------------------------|---------------------------------------------------------------------------------------------------------|------------------------------------------------------------------------------------------------------------------------------------------------------------------------|
| Formula                             | C <sub>66</sub> H <sub>72</sub> AgN <sub>4</sub> O <sub>12</sub> Ru <sub>4</sub>     | C <sub>34</sub> H <sub>42</sub> Cl <sub>2</sub> N <sub>2</sub> O <sub>16</sub> Ru <sub>6</sub>          | C <sub>119</sub> H <sub>98</sub> Cl <sub>4</sub> Cu <sub>6</sub> N <sub>8</sub> O <sub>32</sub> Ru <sub>12</sub>                                                       |
| <i>F</i> <sub>w</sub>               | 1625.42                                                                              | 1412.01                                                                                                 | 3887.93                                                                                                                                                                |
| T, K                                | 100(2)                                                                               | 100(2)                                                                                                  | 100(2)                                                                                                                                                                 |
| λ, Å                                | 0.71073                                                                              | 0.71073                                                                                                 | 0.71073                                                                                                                                                                |
| Crystal system                      | Tetragonal                                                                           | Monoclinic                                                                                              | Triclinic                                                                                                                                                              |
| Space Group                         | <i>P4/nnc</i>                                                                        | <i>P2<sub>1</sub>/c</i>                                                                                 | <i>P</i> <sup>1</sup>                                                                                                                                                  |
| a, Å                                | 18.1524(9)                                                                           | 12.3521(4)                                                                                              | 15.5683(11)                                                                                                                                                            |
| b, Å                                | 18.1524(9)                                                                           | 25.1854(8)                                                                                              | 17.3394(13)                                                                                                                                                            |
| c, Å                                | 21.1288(13)                                                                          | 43.6498(15)                                                                                             | 29.112(2)                                                                                                                                                              |
| α, °                                | 90                                                                                   | 90                                                                                                      | 88.836(3)                                                                                                                                                              |
| β, °                                | 90                                                                                   | 91.6680(10)                                                                                             | 82.133(3)                                                                                                                                                              |
| γ, °                                | 90                                                                                   | 90                                                                                                      | 66.550(2)                                                                                                                                                              |
| Cell Volume, Å <sup>3</sup>         | 69621.1(8)                                                                           | 13573.4(8)                                                                                              | 7136.7(9)                                                                                                                                                              |
| Z                                   | 4                                                                                    | 12                                                                                                      | 2                                                                                                                                                                      |
| D <sub>c</sub> , g cm <sup>-3</sup> | 1.551                                                                                | 2.073                                                                                                   | 1.809                                                                                                                                                                  |
| μ, mm <sup>-1</sup>                 | 1.183                                                                                | 2.137                                                                                                   | 2.245                                                                                                                                                                  |
| F(000)                              | 3260                                                                                 | 8232                                                                                                    | 3788                                                                                                                                                                   |
| Crystal size, mm                    | 0.16×0.13×0.12                                                                       | 0.19×0.16×0.12                                                                                          | 0.21×0.18×0.15                                                                                                                                                         |
| θ limits, °                         | 1.479–25.997                                                                         | 1.617–25.000                                                                                            | 1.589–25.100                                                                                                                                                           |
| Index ranges                        | -22 ≤ h ≤ 22<br>-22 ≤ k ≤ 22                                                         | -14 ≤ h ≤ 14<br>-29 ≤ k ≤ 29                                                                            | -18 ≤ h ≤ 18<br>-20 ≤ k ≤ 20                                                                                                                                           |

|                                                | -26 ≤ l ≤ 26                     | -51 ≤ l ≤ 51                      | -34 ≤ l ≤ 34                      |
|------------------------------------------------|----------------------------------|-----------------------------------|-----------------------------------|
| Reflections collected                          | 69729                            | 179585                            | 127331                            |
| Independent reflections                        | 3442 [R <sub>int</sub> = 0.1026] | 23904 [R <sub>int</sub> = 0.0817] | 25412 [R <sub>int</sub> = 0.0909] |
| Completeness to θ max                          | 100.0%                           | 100.0%                            | 99.9%                             |
| Data / restraints / parameters                 | 3442 / 372 / 267                 | 23904 / 209 / 1611                | 25412 / 1309 / 2003               |
| Goodness on fit on F <sup>2</sup>              | 1.237                            | 1.142                             | 1.037                             |
| R <sub>1</sub> (I > 2σ(I))                     | 0.1013                           | 0.0599                            | 0.0366                            |
| wR <sub>2</sub> (all data)                     | 0.1954                           | 0.1214                            | 0.0848                            |
| Largest diff. peak and hole, e Å <sup>-3</sup> | 1.418 / -1.806                   | 3.052 / -1.815                    | 0.908 / -0.738                    |

|                                     | [H <sub>3</sub> Ru <sub>4</sub> (CO) <sub>12</sub> (CuCH <sub>3</sub> CN)] | [NEt <sub>4</sub> ] <sub>2</sub> [H <sub>2</sub> Ru <sub>4</sub> (CO) <sub>12</sub> (CuBr) <sub>2</sub> ]·CH <sub>2</sub> Cl <sub>2</sub> | [NEt <sub>4</sub> ] <sub>2</sub> [H <sub>2</sub> Ru <sub>12</sub> (CO) <sub>34</sub> Cu <sub>6</sub> Br <sub>2</sub> ]·solv |
|-------------------------------------|----------------------------------------------------------------------------|-------------------------------------------------------------------------------------------------------------------------------------------|-----------------------------------------------------------------------------------------------------------------------------|
| Formula                             | C <sub>14</sub> H <sub>6</sub> CuNO <sub>12</sub> Ru <sub>4</sub>          | C <sub>29</sub> H <sub>44</sub> Br <sub>2</sub> Cl <sub>2</sub> Cu <sub>2</sub> N <sub>2</sub> O <sub>12</sub> Ru <sub>4</sub>            | C <sub>50</sub> H <sub>42</sub> Br <sub>2</sub> Cu <sub>6</sub> N <sub>2</sub> O <sub>34</sub> Ru <sub>12</sub>             |
| <i>F</i> w                          | 848.02                                                                     | 1374.74                                                                                                                                   | 2968.75                                                                                                                     |
| T, K                                | 100(2)                                                                     | 100(2)                                                                                                                                    | 293(2)                                                                                                                      |
| λ, Å                                | 0.71073                                                                    | 0.71073                                                                                                                                   | 0.71073                                                                                                                     |
| Crystal system                      | Triclinic                                                                  | Monoclinic                                                                                                                                | Monoclinic                                                                                                                  |
| Space Group                         | <i>P</i> $\bar{1}$                                                         | <i>I</i> 2/ <i>a</i>                                                                                                                      | <i>P</i> 2/ <i>m</i>                                                                                                        |
| a, Å                                | 8.5369(3)                                                                  | 22.849(6)                                                                                                                                 | 13.7124(12)                                                                                                                 |
| b, Å                                | 10.0317(4)                                                                 | 12.166(3)                                                                                                                                 | 19.7578(17)                                                                                                                 |
| c, Å                                | 13.1229(5)                                                                 | 31.936(10)                                                                                                                                | 17.3324(15)                                                                                                                 |
| α, °                                | 86.3950(10)                                                                | 90                                                                                                                                        | 90                                                                                                                          |
| β, °                                | 71.6300(10)                                                                | 99.819(5)                                                                                                                                 | 111.328(4)                                                                                                                  |
| γ, °                                | 85.3670(10)                                                                | 90                                                                                                                                        | 90                                                                                                                          |
| Cell Volume, Å <sup>3</sup>         | 1062.25(7)                                                                 | 8748(4)                                                                                                                                   | 4374.2(7)                                                                                                                   |
| Z                                   | 2                                                                          | 8                                                                                                                                         | 2                                                                                                                           |
| D <sub>c</sub> , g cm <sup>-3</sup> | 2.651                                                                      | 2.088                                                                                                                                     | 2.254                                                                                                                       |
| μ, mm <sup>-1</sup>                 | 3.825                                                                      | 4.304                                                                                                                                     | 4.412                                                                                                                       |
| F(000)                              | 796                                                                        | 5328                                                                                                                                      | 2800                                                                                                                        |
| Crystal size, mm                    | 0.21×0.18×0.14                                                             | 0.16×0.12×0.10                                                                                                                            | 0.18×0.16×0.12                                                                                                              |
| θ limits, °                         | 1.636–27.000                                                               | 1.160–24.999                                                                                                                              | 1.629–25.048                                                                                                                |

|                                                   |                                              |                                              |                                              |
|---------------------------------------------------|----------------------------------------------|----------------------------------------------|----------------------------------------------|
| Index ranges                                      | -10 ≤ h ≤ 10<br>-12 ≤ k ≤ 12<br>-16 ≤ l ≤ 16 | -27 ≤ h ≤ 26<br>-14 ≤ k ≤ 14<br>-37 ≤ l ≤ 37 | -16 ≤ h ≤ 16<br>-23 ≤ k ≤ 23<br>-20 ≤ l ≤ 20 |
| Reflections collected                             | 20903                                        | 33801                                        | 50323                                        |
| Independent reflections                           | 4626 [R <sub>int</sub> = 0.0428]             | 7716 [R <sub>int</sub> = 0.1227]             | 8024 [R <sub>int</sub> = 0.0956]             |
| Completeness to θ max                             | 99.9%                                        | 100.0%                                       | 99.9%                                        |
| Data / restraints / parameters                    | 4626 / 0 / 299                               | 7716 / 215 / 470                             | 8024 / 270 / 516                             |
| Goodness on fit on F <sup>2</sup>                 | 1.179                                        | 1.172                                        | 1.082                                        |
| R <sub>1</sub> (I > 2σ(I))                        | 0.0170                                       | 0.1706                                       | 0.0643                                       |
| wR <sub>2</sub> (all data)                        | 0.0399                                       | 0.4055                                       | 0.1727                                       |
| Largest diff. peak and hole,<br>e Å <sup>-3</sup> | 1.082 / -0.501                               | 3.404 / -5.407                               | 1.746 / -1.094                               |
